# Supplementary material
Source: PubMed Central journal article supplement (PMC8218765)
Supplement: jcm.02942-20-s0001.pdf [file jcm.02942-20-s0001.pdf]

**Table S1. Non-scrub typhus diseases identified in the study**

| Diagnosis                                    | Number of patients |
|----------------------------------------------|--------------------|
| Tick bite                                    | 26                 |
| Rickettsial diseases                         | 4                  |
| Lyme disease                                 | 4                  |
| Anaplasmosis                                 | 8                  |
| Q-fever                                      | 5                  |
| SFTS                                         | 5                  |
| HFRS                                         | 7                  |
| Malaria                                      | 1                  |
| Salmonellosis, Shigellosis                   | 2                  |
| AIDS                                         | 5                  |
| Dengue fever                                 | 3                  |
| Chickenpox                                   | 3                  |
| Other Viral infections*                      | 20                 |
| Bacteremia                                   | 22                 |
| Fungemia                                     | 1                  |
| Cellulitis                                   | 3                  |
| Abscess                                      | 2                  |
| Pneumonia                                    | 15                 |
| Gastrointestinal & biliary tract infection** | 7                  |
| Acute gastroenteritis                        | 10                 |
| URI                                          | 3                  |
| UTI                                          | 20                 |
| Arthritis                                    | 4                  |
| SLE                                          | 2                  |
| Raynaud syndrome                             | 1                  |
| Wegener's granulomatosis                     | 1                  |
| HLD                                          | 1                  |
| NSTEMI, IHD                                  | 3                  |
| MDS                                          | 1                  |
| Prostate cancer, Lymphoma, Adenoma, AML      | 4                  |
| Rhabdomyolysis                               | 1                  |
| FUO                                          | 6                  |
| <b>Total</b>                                 | <b>200</b>         |

SFTS (Severe Fever with Thrombocytopenia Syndrome), HFRS (Hemorrhagic Fever with Renal Syndrome), AIDS (Acquired Immunodeficiency Syndrome), URI (Upper Respiratory Infection), UTI (Urinary Tract Infection), SLE (Systemic Lupus Erythematosus), HLD (Herniated Lumbar Disk), NSTEMI (non—ST Elevation Myocardial Infarction), IHD (Ischemic Heart Disease), MDS (Myelodysplastic Syndrome), AML (Acute Myelogenous Leukemia), FUO (Fever of Unknown Origin)

\*EBV, Herpes zoster, Influenza B, Viral meningitis

\*\*Gastroenteritis, Enteritis, Cholangitis, Cholecystitis
